# Supplementary material
Source: Springer Nature journal article supplement (https://www.springermedizin.de/resource/supplementary/12958_2003_112_MOESM7_ESM.pdf/9566146)

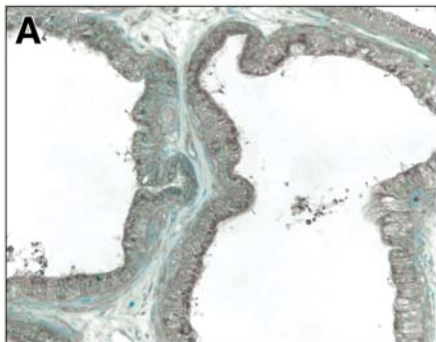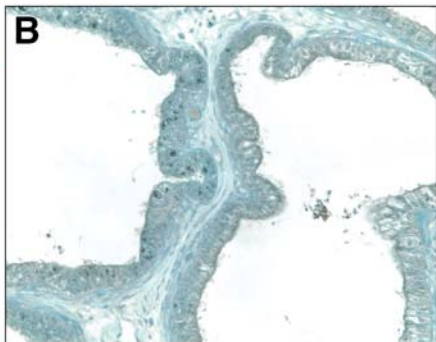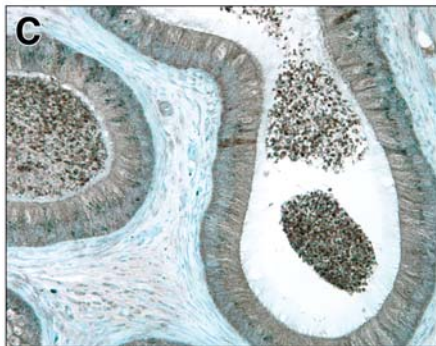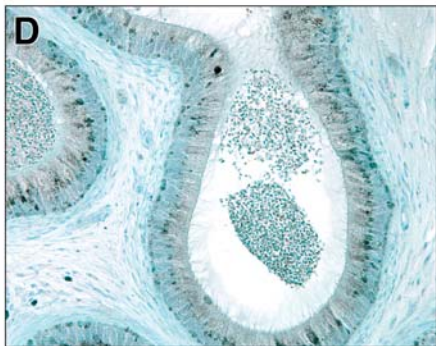

Supplement: MOESM7 [file 9566146]
